# Supplementary material
Source: Springer Nature journal article supplement (https://www.springermedizin.de/resource/supplementary/13550_2013_166_MOESM1_ESM.pdf/9687732)
Supplement: MOESM1 [file 9687732]

# **$^{18}\text{F}$ -click labeling and preclinical evaluation of a new $^{18}\text{F}$ -folate for PET imaging**

H. Schieferstein <sup>a,\*</sup>, T. Betzel <sup>b</sup>, C.R. Fischer <sup>b</sup>, T.L. Ross <sup>a,\*</sup>

<sup>a</sup> Institute of Nuclear Chemistry, Johannes Gutenberg-University, 55128 Mainz, Germany

<sup>b</sup> Center for Radiopharmaceutical Sciences of ETH, PSI and USZ, Institute of Pharmaceutical Sciences, ETH Zurich, Zurich, Switzerland

*Keywords:* PET, fluorine-18, folic acid, folate receptor, click chemistry

\* Corresponding author. Institute of Nuclear Chemistry, Johannes Gutenberg-University, 55128 Mainz, Germany. Tel.: +49 (0)6131 39-25316; fax +49 (0)6131 39-24510.

## Table of contents

|                                                                                                        |   |
|--------------------------------------------------------------------------------------------------------|---|
| ORGANIC CHEMISTRY .....                                                                                | 4 |
| <sup>1</sup> H and <sup>13</sup> C nuclear magnetic resonance experiments                              |   |
| Low-resolution mass spectra (LR-MS) and high-resolution mass spectra (HR-MS)                           |   |
| High-Pressure Liquid Chromatography                                                                    |   |
| 2-(2-(2-(prop-2-yn-1-yloxy)ethoxy)ethoxy)ethanol                                                       |   |
| Figure 1. <sup>1</sup> H NMR; 300MHz, CDCl <sub>3</sub>                                                |   |
| 3-(2-(2-(2-fluoroethoxy)ethoxy)ethoxy)prop-1-yne                                                       |   |
| Figure 2. <sup>1</sup> H NMR; 300MHz, CDCl <sub>3</sub>                                                |   |
| 2-(2-(2-(prop-2-yn-1-yloxy)ethoxy)ethoxy)ethyl 4-methylbenzenesulfonate                                |   |
| Figure 3. <sup>1</sup> H NMR; 300MHz, CDCl <sub>3</sub>                                                |   |
| Figure 4. FD-MS; CH <sub>2</sub> Cl <sub>2</sub>                                                       |   |
| N-(tert.-butoxycarbonyl)glutamic acid α-methyl ester                                                   |   |
| Figure 5. <sup>13</sup> C NMR; 300MHz, CDCl <sub>3</sub>                                               |   |
| Figure 6. <sup>1</sup> H NMR; 300MHz, CDCl <sub>3</sub>                                                |   |
| N2-N,N-dimethylaminomethylene-10-formyl-α-O-methyl-γ-(11-azido-3,6,9-trioxaundecanyl) folic acid amide |   |
| Figure 7. <sup>1</sup> H NMR; 400MHz, CDCl <sub>3</sub>                                                |   |
| Figure 8. <sup>13</sup> C NMR; 300MHz, CDCl <sub>3</sub>                                               |   |
| Figure 9. DEPT-135 NMR; 400MHz, CDCl <sub>3</sub>                                                      |   |
| Figure 10. ESI-MS <sup>+</sup> ; MeCN                                                                  |   |
| γ-(11-azido-3,6,9-trioxaundecanyl)folic acid amide                                                     |   |
| Figure 11. <sup>1</sup> H NMR; 400MHz, CDCl <sub>3</sub>                                               |   |
| Figure 12. <sup>13</sup> C NMR; 400MHz, CDCl <sub>3</sub>                                              |   |
| Figure 13. DEPT-135 NMR; 400MHz, CDCl <sub>3</sub>                                                     |   |
| Figure 14. ESI-MS <sup>+</sup> ; NH <sub>4</sub> HCO <sub>3</sub> -Buffer (0.05 M)                     |   |
| Figure 15. ESI-MS <sup>+</sup> (high resolution); NH <sub>4</sub> HCO <sub>3</sub> -buffer (0.05 M)    |   |

16-(4-(((2-amino-4-oxo-3,4-dihydropteridin-6-yl)methyl)amino)benzamido)-1-(4-(2-(2-(2-fluoroethoxy)ethoxy)ethoxy)-1H-1,2,3-triazol-1-yl)-13-oxo-3,6,9-trioxa-12-azaheptadecan-17-oic acid

Figure 16.  $^1\text{H}$  NMR; 400MHz, DMSO- $d_6$

Figure 17  $^{13}\text{C}$  NMR; 400MHz, DMSO- $d_6$

Figure 18. ESI- $\text{MS}^+$ ; Na/K-phosphate-buffer (0.05 M)

RADIOCHEMISTRY .....20

Figure 19. Optimization of the radiolabeling of the prosthetic group

BIOLOGY .....23

Figure 20. Plasmastability tests using fetal calve serum

## Organic Chemistry

### **<sup>1</sup>H and <sup>13</sup>C nuclear magnetic resonance experiments**

<sup>1</sup>H and <sup>13</sup>C nuclear magnetic resonance spectra were recorded on either a Bruker 300 MHz or 400 MHz spectrometer. Chemical shifts ( $\delta$ ) to solvent are reported in parts per million (ppm) relative to tetramethylsilane and referenced; the following abbreviations are used in the experimental section for the description of <sup>1</sup>H-NMR spectra: singlet (s), doublet (d), triplet (t), multiplet (m), broad singlet (br). The chemical shifts of complex multiplets are given as the range of their occurrence.

### **Low-resolution mass spectra (LR-MS) and high-resolution mass spectra (HR-MS)**

Low-resolution mass spectra (LR-MS) and high-resolution mass spectra (HR-MS) were recorded on either a Micromass Quattro micro API LC-ESI or a Finnigan MAT90-Spectrometer.

### **High-Pressure Liquid Chromatography**

For analysis and purification via radio-HPLC, a 50 mM phosphate buffer at pH 7.4 was used (11.29 mmol/L NaH<sub>2</sub>PO<sub>4</sub>×H<sub>2</sub>O and 38.71 mmol/L Na<sub>2</sub>HPO<sub>4</sub>×2H<sub>2</sub>O). Analytical radio-HPLC was performed on an Agilent 1100 series HPLC system, equipped with a 100  $\mu$ L loop and a GabiStar radiodetector (Raytest). A reversed-phase column (Gemini C18, 5  $\mu$ m, 4.6 × 250 mm, Phenomenex<sup>®</sup>) was used at a flow rate of 1 mL/min with a method as follows: 0-5 min 15% **B** (isocratic), 5-50 min 15-50% **B** (gradient) with **A**=50 mM phosphate buffer and **B**=methanol).

For semipreparative purification, a semi-preparative radio-HPLC was used, equipped with a Smartline Pump 1000, Smartline Manager 5000, Smartline UV-detector 2500 (Knauer), GabiStar radiodetector (Raytest) and a 5 mL loop. A reversed-phase column (Gemini C18, 5  $\mu$ m, 10 × 250 mm, Phenomenex<sup>®</sup>) was used. The labeled synthon, [<sup>18</sup>F]fluoroethoxy)ethoxy)ethoxy)-1H-1,2,3-triazol-1-yl)-13-oxo-3,6,9-trioxa-12-azaheptadecan-17-oic acid ([<sup>18</sup>F]**11**) was purified, using a flow rate of 3.6 mL/min under isocratic conditions (30% **B**).

For the purification of the radiotracer <sup>18</sup>F-OEG folate the following method was used at a flow of 5 mL/min: 0-5 min 100% **A** (isocratic), 5-25 min 0-55% **B** (gradient), 25-35 min 55% **B** (isocratic).

Determination of relative lipophilicity was performed on Dionex ICS-5000 system equipped with a photo diode detector (PDA) using a reversed-phase (Gemini 5 $\mu$  C18 250 × 4.6 mm, Phenomenex<sup>®</sup>) column and an isocratic solvent system as follows: 80% aqueous solution (pH 2 with *orthophosphoric acid*) and 20% acetonitrile.

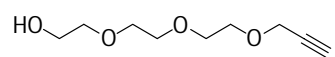

$^1\text{H}$  NMR (300 MHz,  $\text{CDCl}_3$ )  $\delta$  4.16 (d, 2H), 3.71-3.62 (m, 10H), 3.57 (m, 2H), 2.60 (br, 1H), 2.41 (t, 1H) ppm.

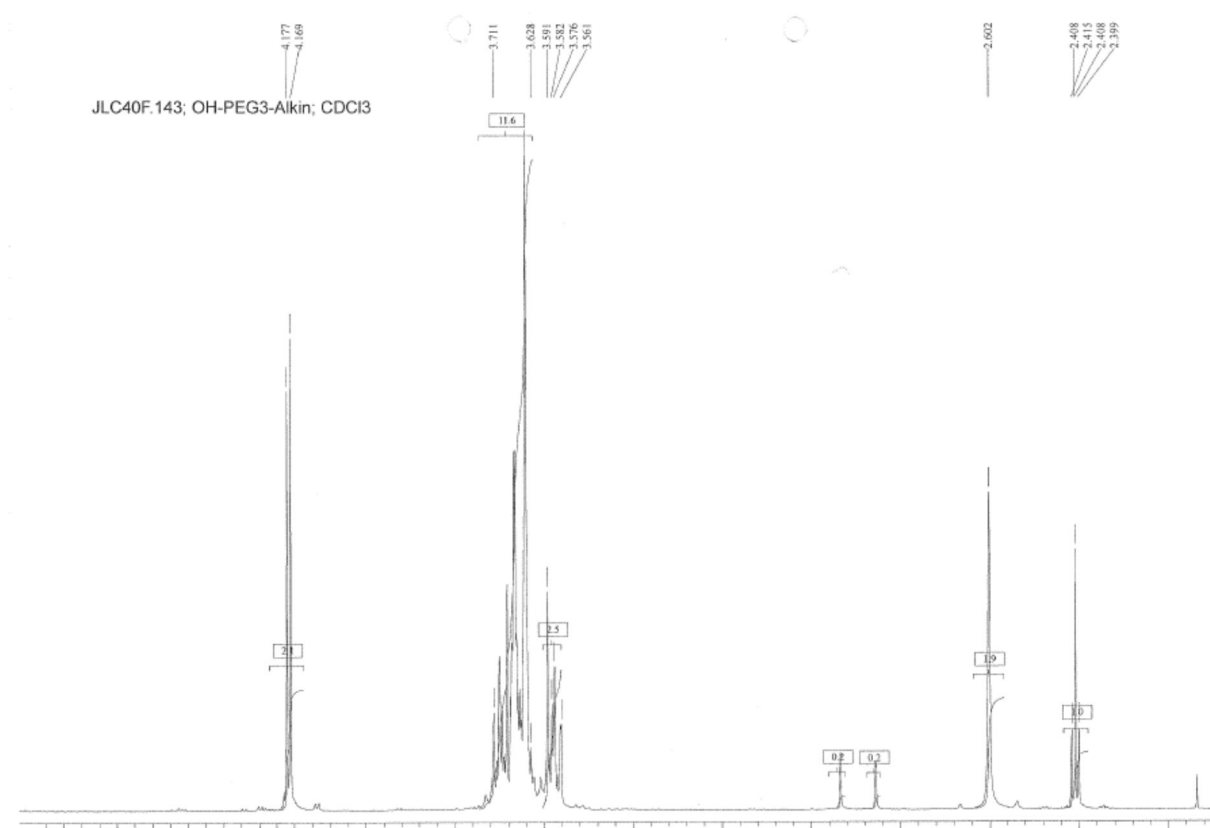

Figure 1.  $^1\text{H}$  NMR; 300MHz,  $\text{CDCl}_3$

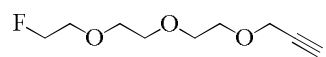

$^1\text{H}$  NMR (300 MHz,  $\text{CDCl}_3$ )  $\delta$  4.61 (t, 1H), 4.44 (t, 1H), 4.17 (d, 2H), 3.67-3.65 (m, 10H), 2.40 (t, 1H) ppm. LR-MS:  $[\text{M}+\text{H}]^+ = 191.5$  (calc. for  $\text{C}_9\text{H}_{15}\text{FO}_3$ : 191.1).

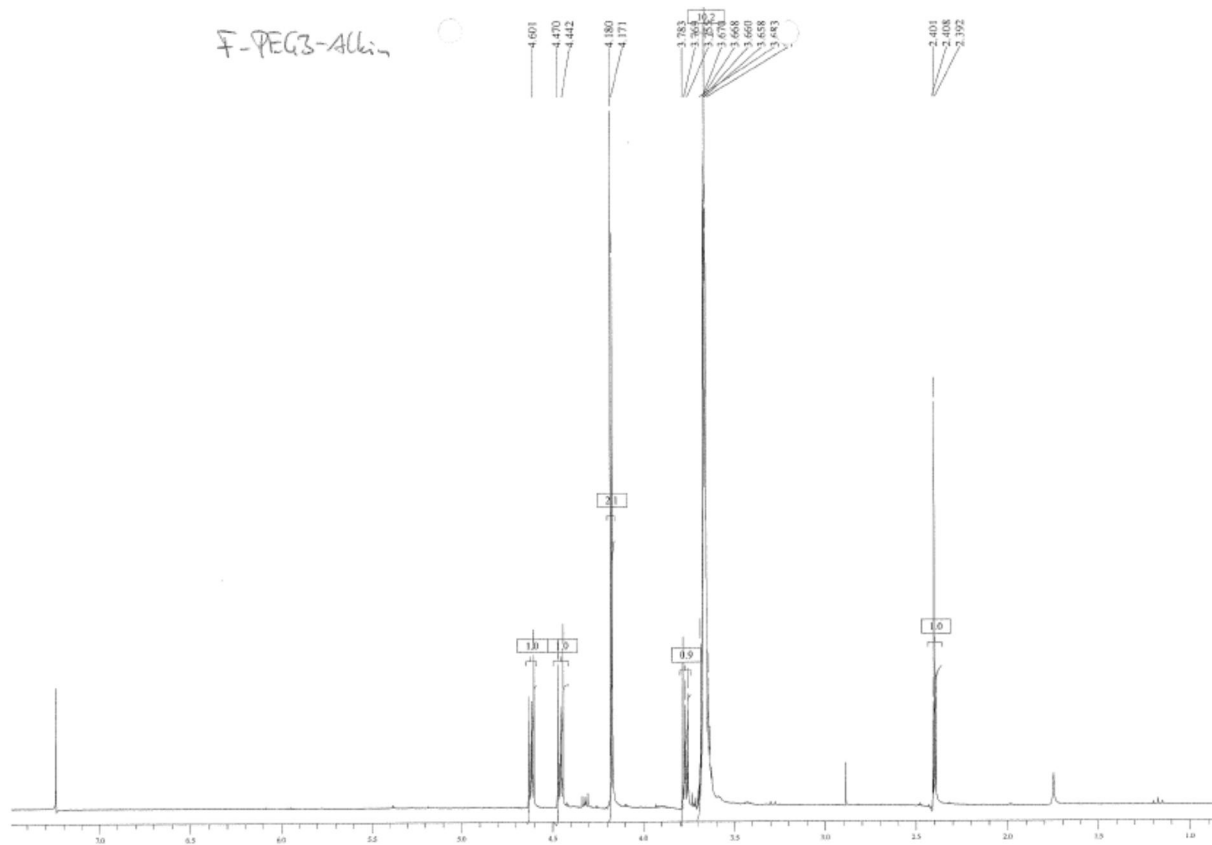

Figure 2.  $^1\text{H}$  NMR; 300MHz,  $\text{CDCl}_3$

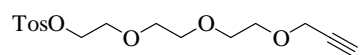

$^1\text{H}$  NMR (300 MHz,  $\text{CDCl}_3$ )  $\delta$  7.75 (d, 2H), 7.30 (d, 2H), 4.15-4.11 (m, 4H), 3.67-3.59 (m, 6H), 2.41 (s, 3H), 2.40 (t, 1H) ppm.  $^{13}\text{C}$  NMR (75 MHz,  $\text{CDCl}_3$ )  $\delta$  132.96, 129.79, 127.96, 79.59, 74.54, 70.70, 70.53, 70.41, 69.21, 69.04, 68.65, 58.36, 21.61 ppm. LR-MS:  $[\text{M}+\text{H}]^+ = 343.5$  (calc. for  $\text{C}_{16}\text{H}_{22}\text{O}_6\text{S}$ : 343.1).

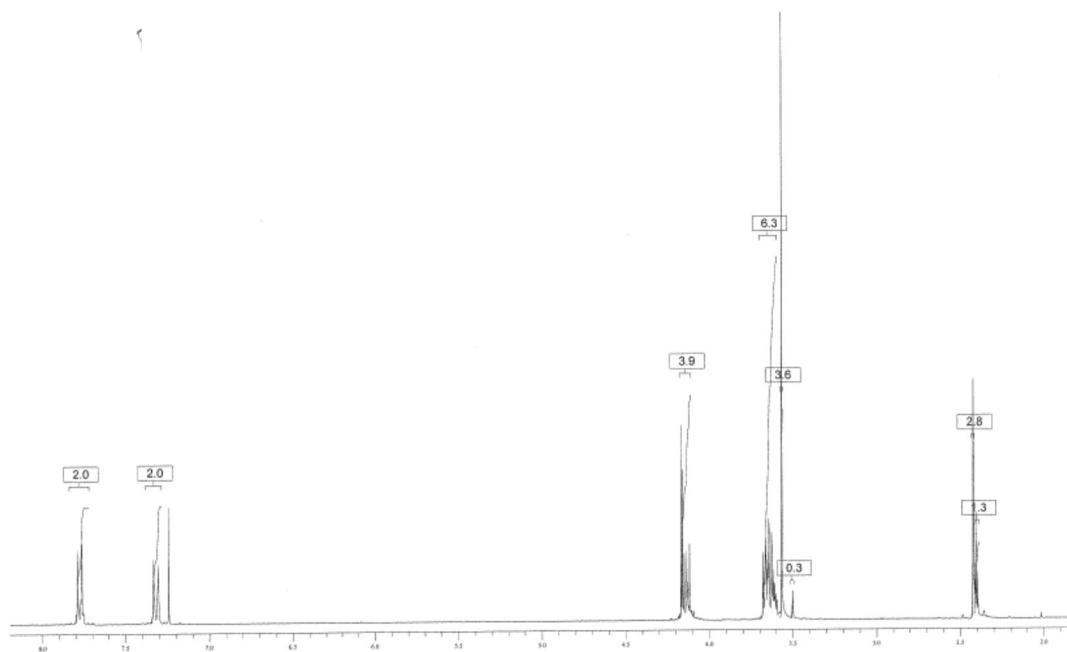

Figure 3.  $^1\text{H}$  NMR; 300MHz,  $\text{CDCl}_3$





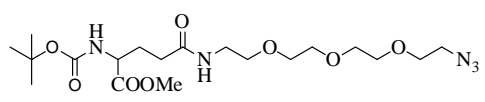

JAC10F.149; CDCl<sub>3</sub>; Boc-Glu-PEG4-N<sub>3</sub>; TMP; MeCN

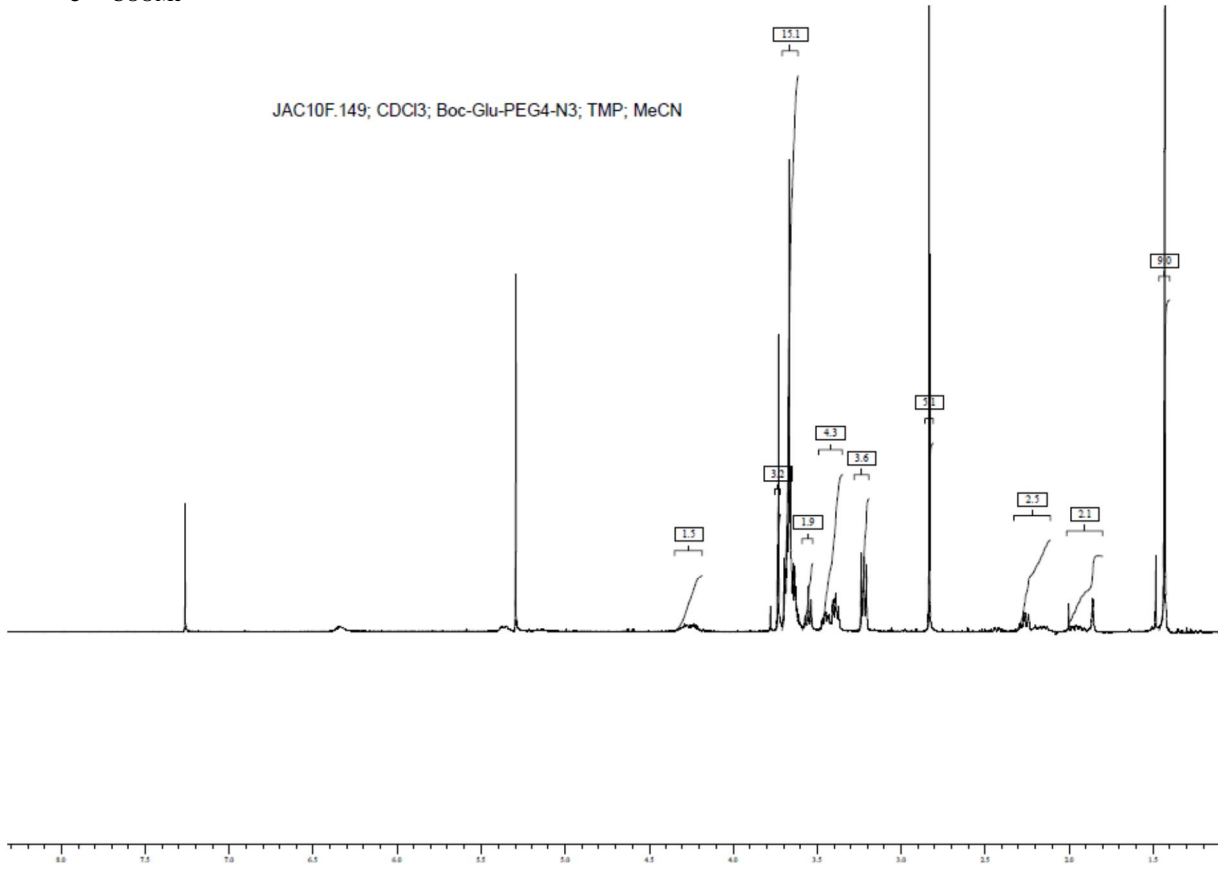

Figure 6. <sup>1</sup>H NMR; 300MHz, CDCl<sub>3</sub>

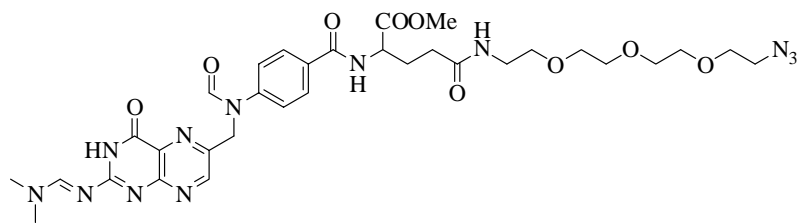

$^1\text{H NMR}$  (400 MHz,  $\text{CDCl}_3$ )  $\delta$  8.91 (s, 1H), 8.70 (d, 2H), 7.87 (d, 2H), 7.30 (d, 2H), 5.29 (s, 2H), 4.61-4.56 (m, 1H), 3.70 (s, 3H), 3.60-3.40 (m, 12H), 3.36 (m, 2H), 3.34 (t, 2H), 3.19 (s, 3H), 3.12 (s, 3H), 2.45-2.32 (m, 2H), 2.20-2.13 (m, 2H) ppm. LR-MS:  $[\text{M}+\text{H}]^+ = 739.36$ ,  $[\text{M}+\text{Na}]^+ = 761.33$  (calc. for  $\text{C}_{32}\text{H}_{42}\text{N}_{12}\text{NaO}_9$ : 761.31).

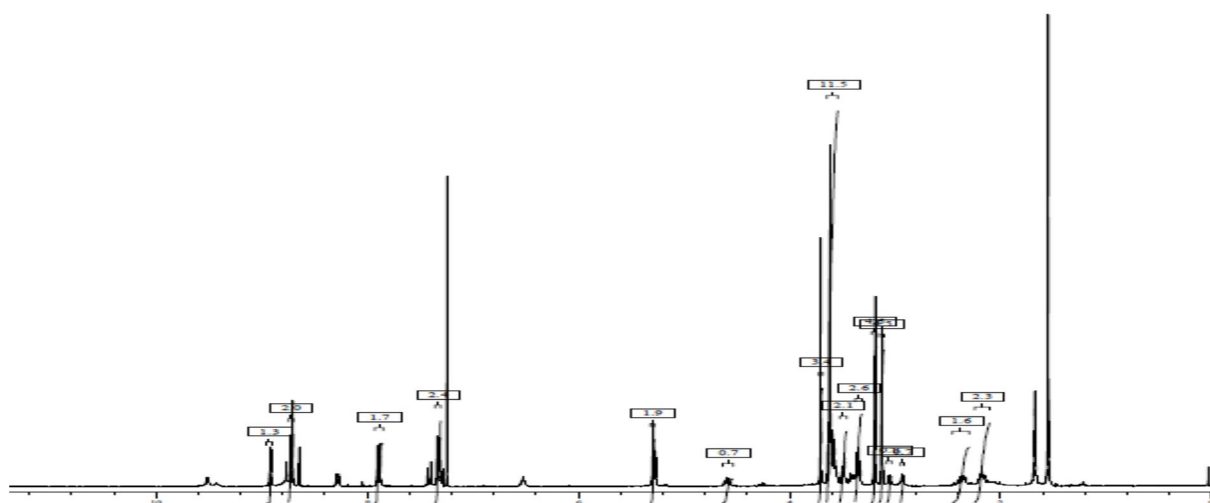

Figure 7.  $^1\text{H NMR}$ ; 400MHz,  $\text{CDCl}_3$

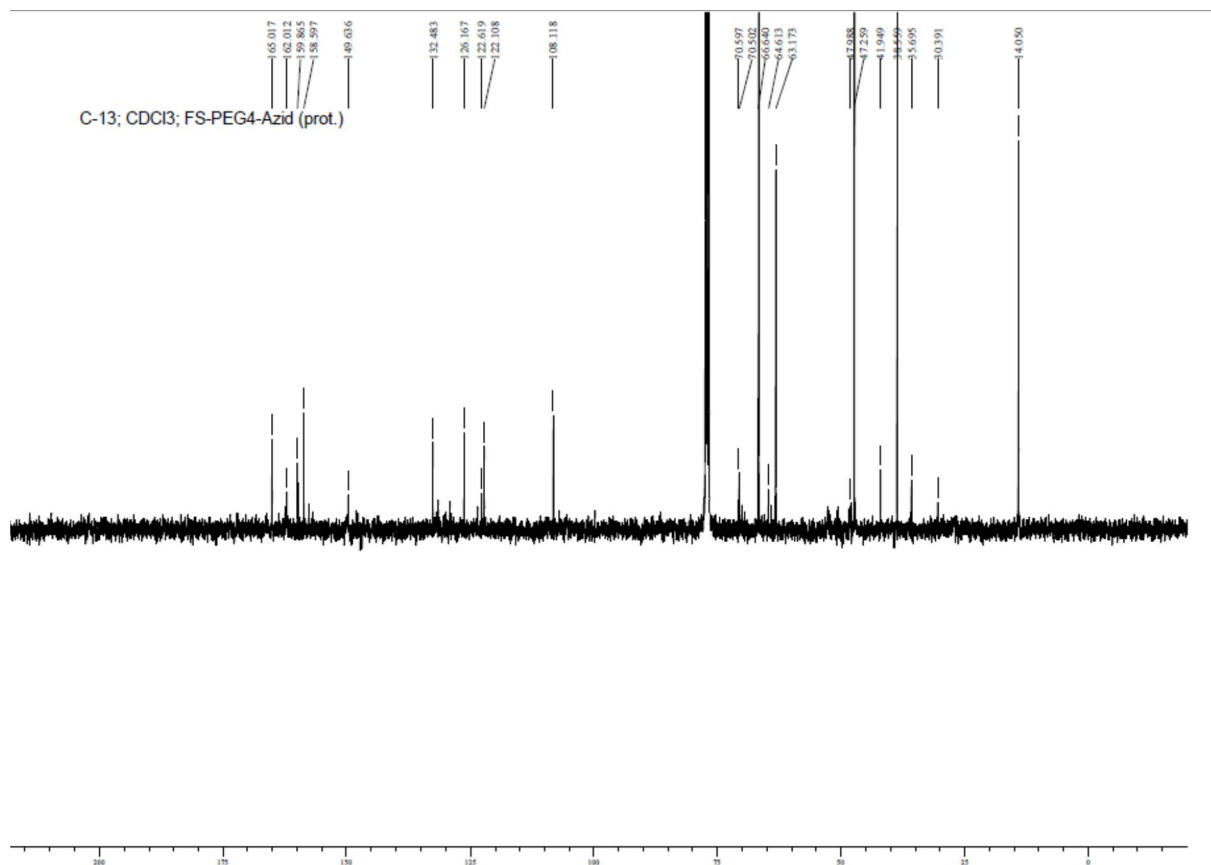

Figure 8. <sup>13</sup>C NMR; 300MHz, CDCl<sub>3</sub>

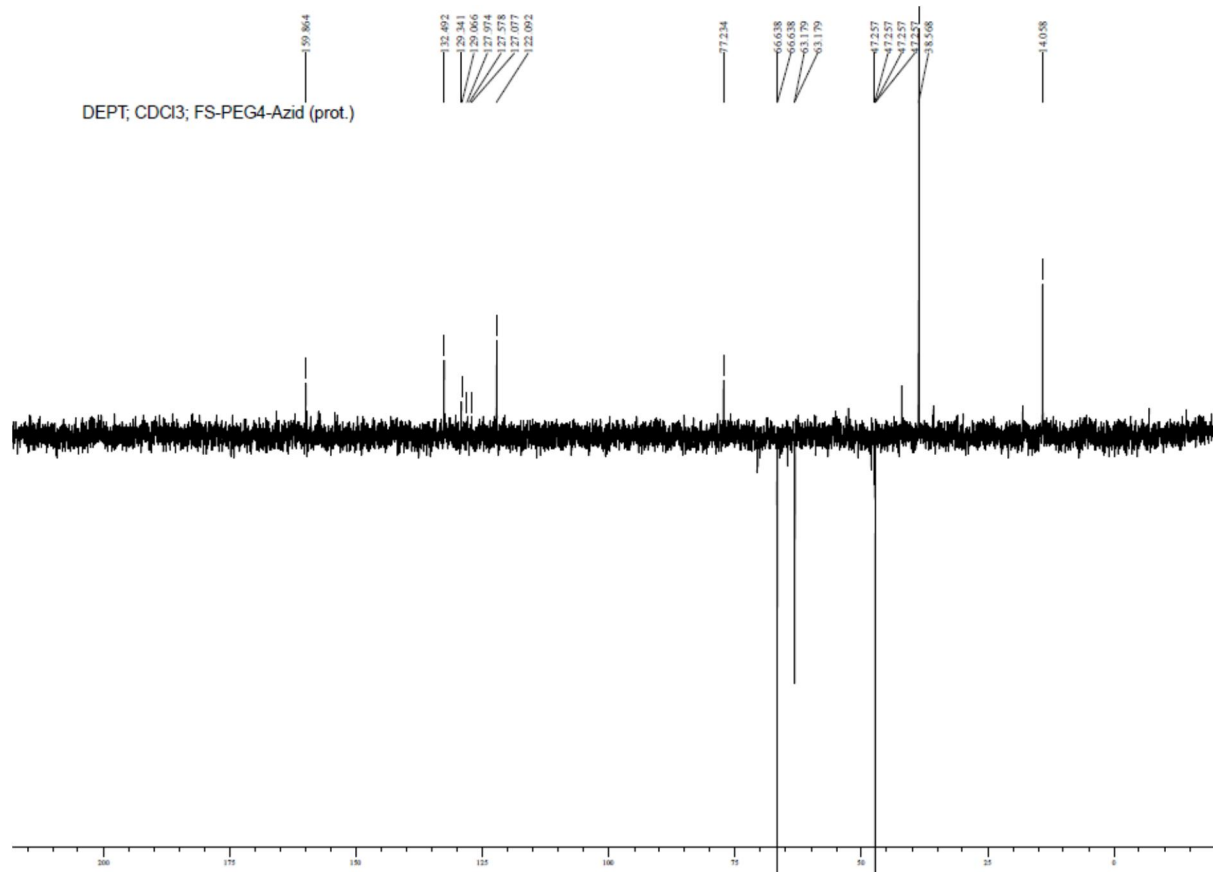

Figure 9. DEPT-135 NMR; 400MHz, CDCl<sub>3</sub>

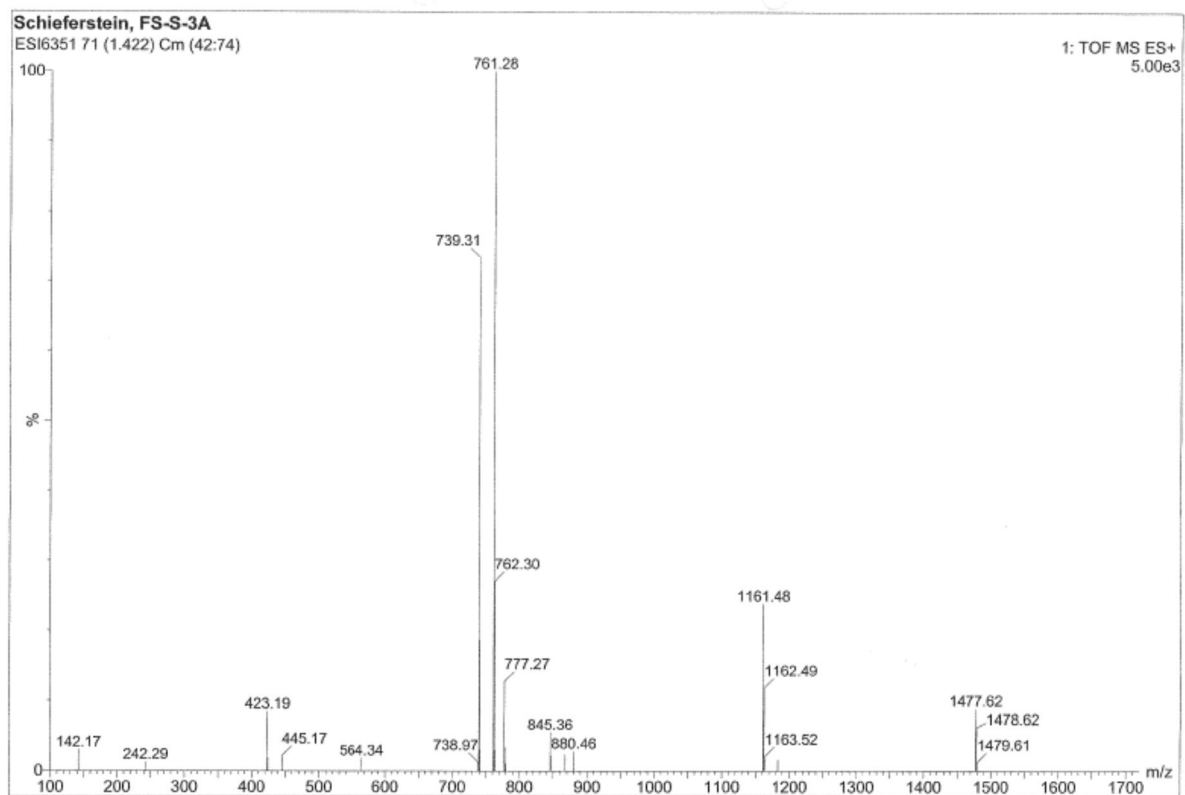

Figure 10. ESI-MS<sup>+</sup>; MeCN

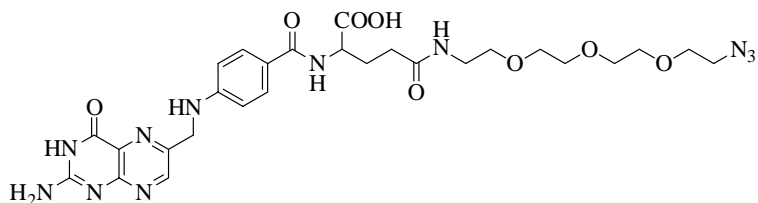

<sup>1</sup>H NMR (400 MHz, DMSO-d<sub>6</sub>) δ 11.52 (br, 1H), 8.63 (s, 1H), 7.62 (d, 2H), 6.61 (d, 2H), 4.46 (s, 2H), 4.26-4.24 (m, 1H), 3.57 (t, 2H), 3.52-3.35 (m, 10H), 3.17 (m, 2H), 2.18 (m, 2H), 2.06-1.99 (m, 1H), 1.93-1.83 (m, 1H) ppm. <sup>13</sup>C NMR (100 MHz, DMSO-d<sub>6</sub>) δ 174.32, 172.14, 166.70, 154.26, 151.21, 149.13, 129.59, 129.41, 128.41, 121.80, 111.61, 72.79, 70.22, 70.17, 70.12, 70.0, 69.69, 60.65, 52.70, 50.42, 46.36, 32.40, 27.04 ppm. [M+Na]<sup>+</sup> = 664.28 (calc. for C<sub>27</sub>H<sub>35</sub>N<sub>11</sub>NaO<sub>8</sub>: 664.26) HR-MS: [M+H]<sup>+</sup> = 642.2746 (calc. for C<sub>27</sub>H<sub>35</sub>N<sub>11</sub>O<sub>8</sub>: 642.2748).

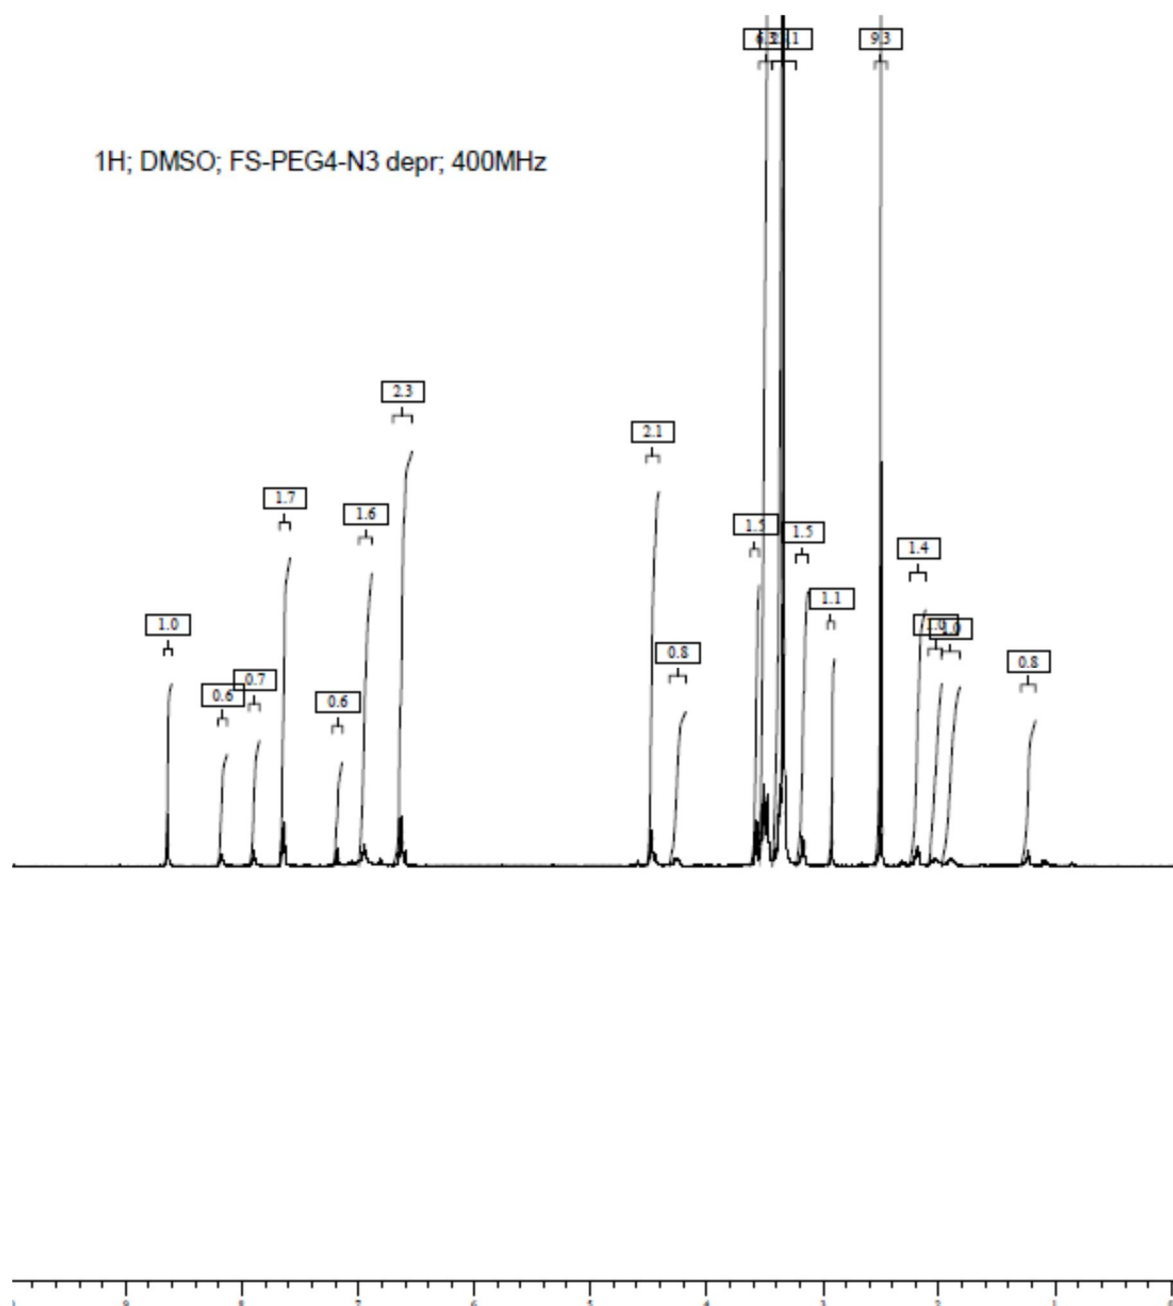

Figure 11.  $^1\text{H}$  NMR; 400MHz,  $\text{CDCl}_3$

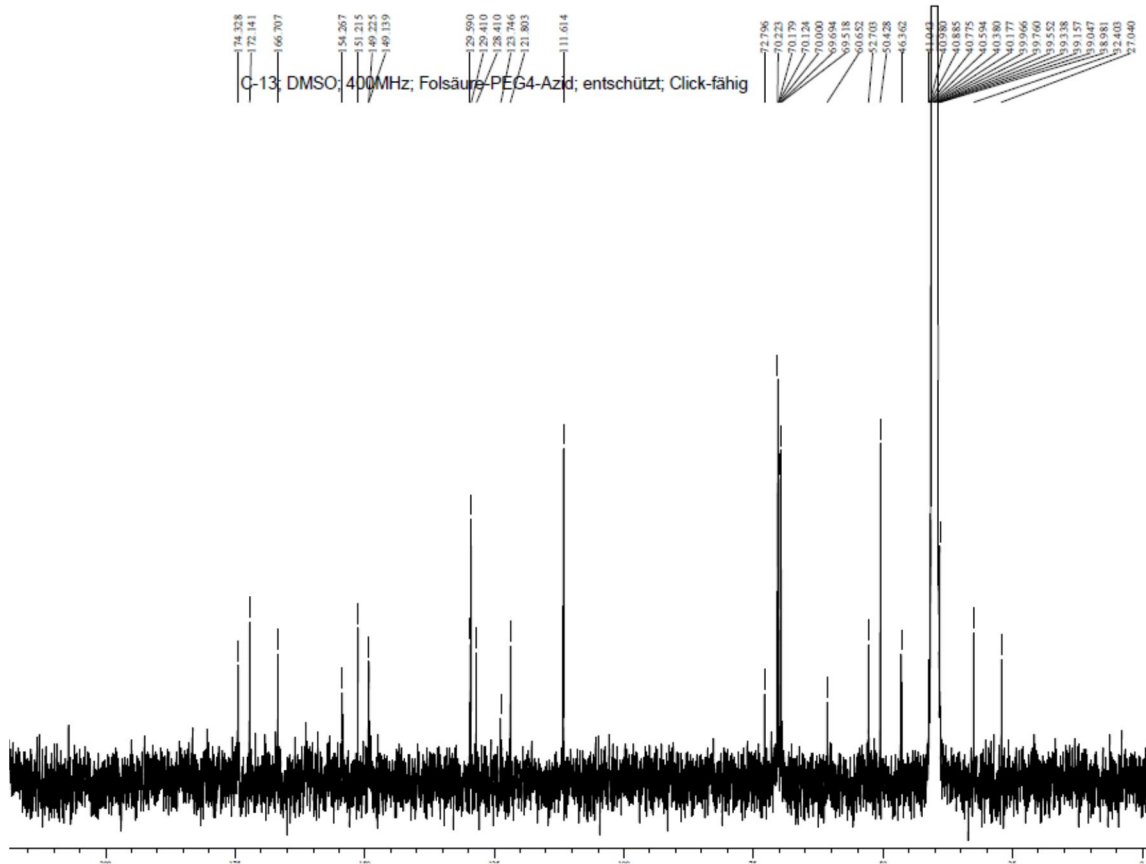

Figure 12.  $^{13}\text{C}$  NMR; 400MHz,  $\text{CDCl}_3$

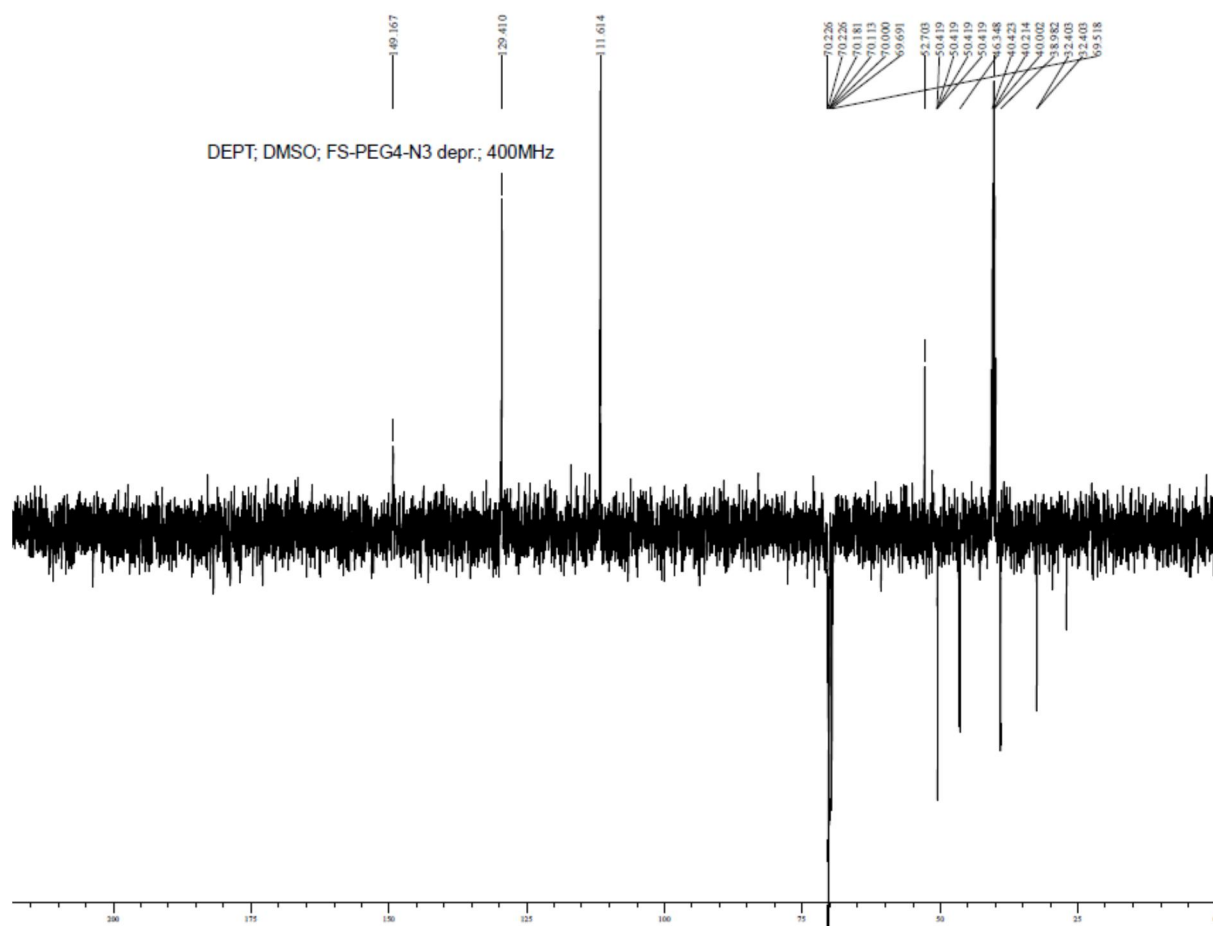

Figure 13. DEPT-135 NMR; 400MHz,  $\text{CDCl}_3$



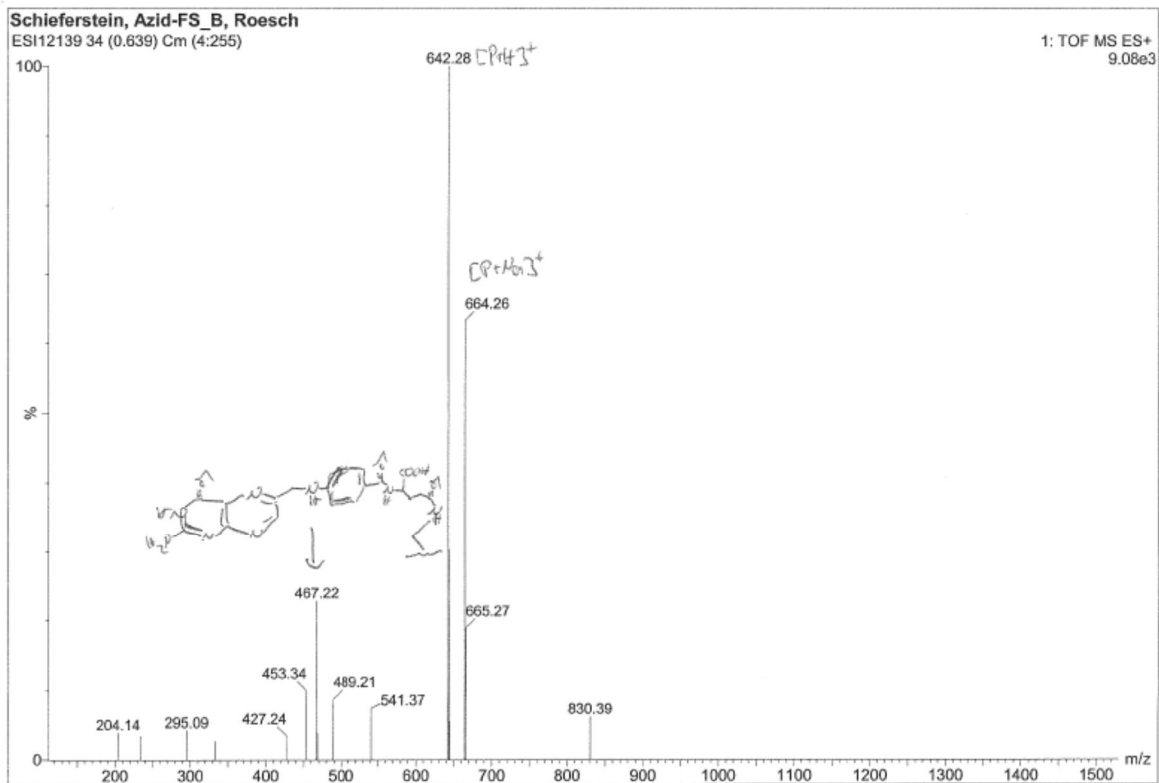

Figure 14. ESI-MS<sup>+</sup>; NH<sub>4</sub>HCO<sub>3</sub>-Buffer (0.05 M)

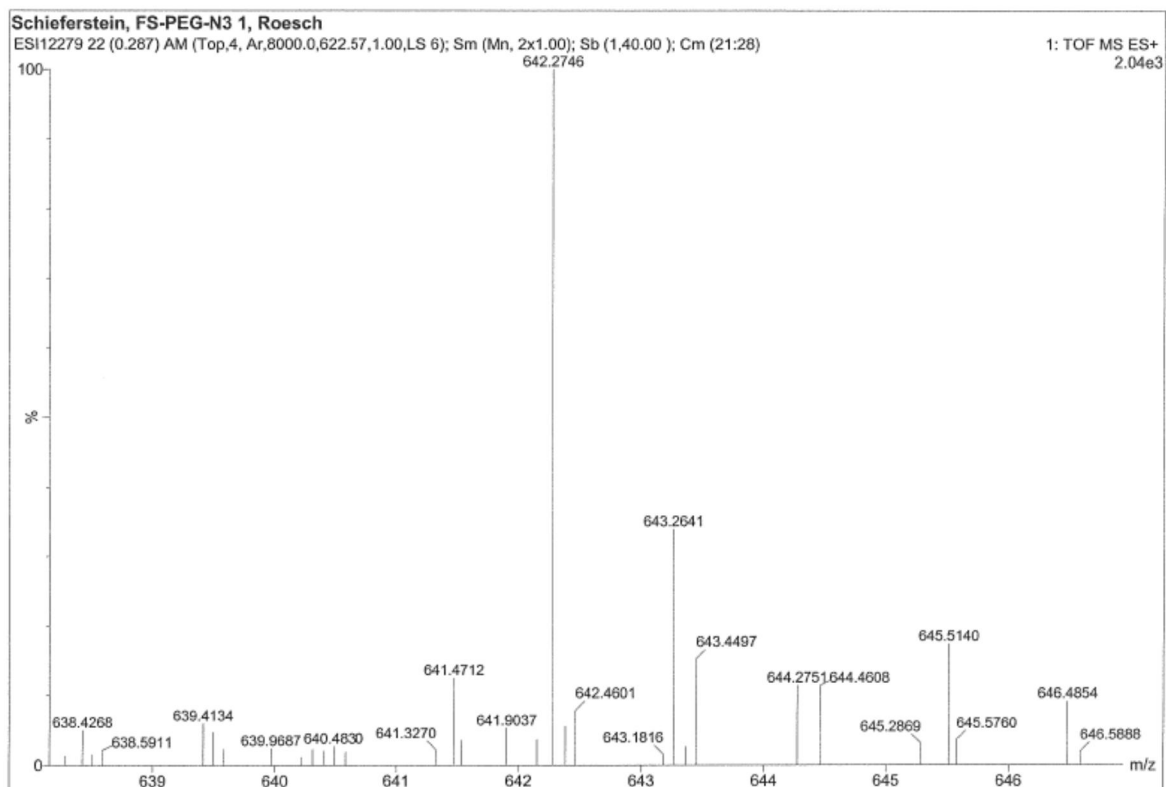

Figure 15. ESI-MS<sup>+</sup> (high resolution); NH<sub>4</sub>HCO<sub>3</sub>-buffer (0.05 M)

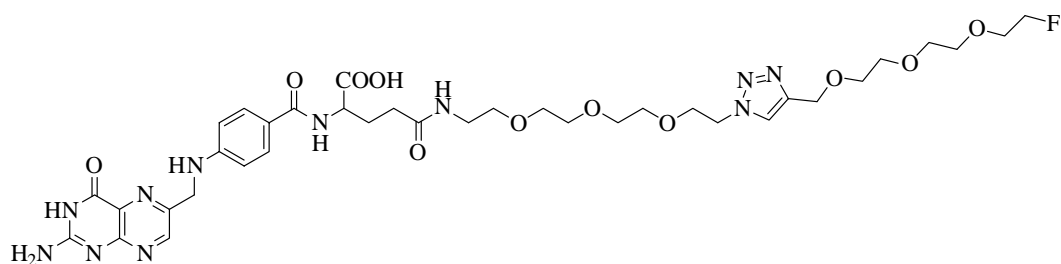

$^1\text{H}$  NMR (400 MHz,  $\text{DMSO-d}_6$ )  $\delta$  11.58 (br, 1H), 8.63 (s, 1H), 8.18 (d, 1H), 7.93-7.88 (d, 2H), 7.63 (d, 2H), 6.98-6.94 (m, 2H), 6.62 (d, 2H), 4.55 (t, 1H), 4.50 (s, 2H), 4.43 (t, 1H), 4.28-4.22 (m, 1H), 3.87 (t, 2H), 3.65 (t, 2H), 3.58 (t, 2H), 3.55-3.41 (m, 22 H), 3.35 (t, 2H), 3.18-3.12 (m, 2H), 2.20-2.16 (m, 2H), 2.07-1.98 (m, 1H), 1.93-1.84 (m, 1H) ppm.  $^{13}\text{C}$  NMR (100 MHz,  $\text{DMSO-d}_6$ )  $\delta$  174.44, 172.13, 166.69, 161.26, 151.22, 149.17, 148.89, 144.88, 129.42, 124.56, 121.69, 111.53, 84.42, 82.56, 70.25, 70.21, 70.13, 70.1, 70.03, 69.50, 69.40, 69.14, 64.05, 52.67, 49.74, 46.35, 32.47, 26.73 ppm. LR-MS:  $[\text{M}+\text{K}]^+ = 870.36$  (calc. for  $\text{C}_{36}\text{H}_{50}\text{FKN}_{11}\text{O}_{11}$ : 870.33),  $[\text{M}+2\text{K}]^+ = 908.32$  (calc. for  $\text{C}_{36}\text{H}_{49}\text{FK}_2\text{N}_{11}\text{O}_{11}$ : 908.29),  $[\text{M}+2\text{K}]^{2+} = 454.65$  (calc. for  $\text{C}_{36}\text{H}_{49}\text{FK}_2\text{N}_{11}\text{O}_{11}$ : 454.15).

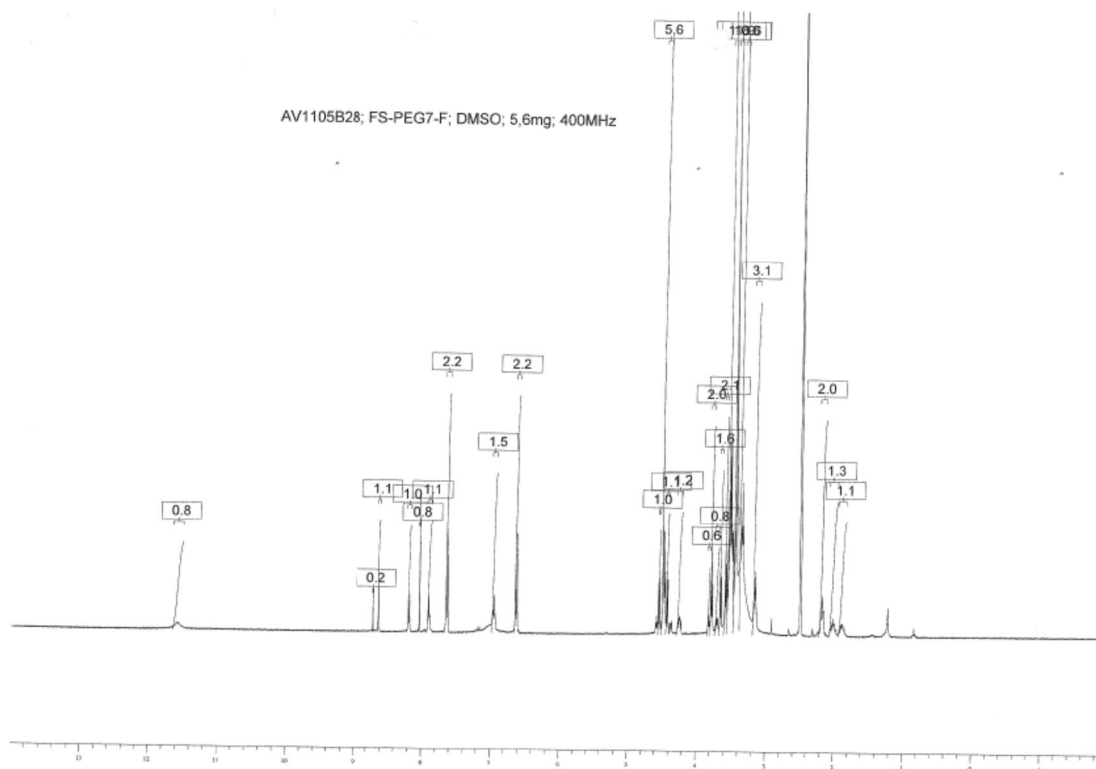

Figure 16.  $^1\text{H}$  NMR; 400MHz,  $\text{DMSO-d}_6$

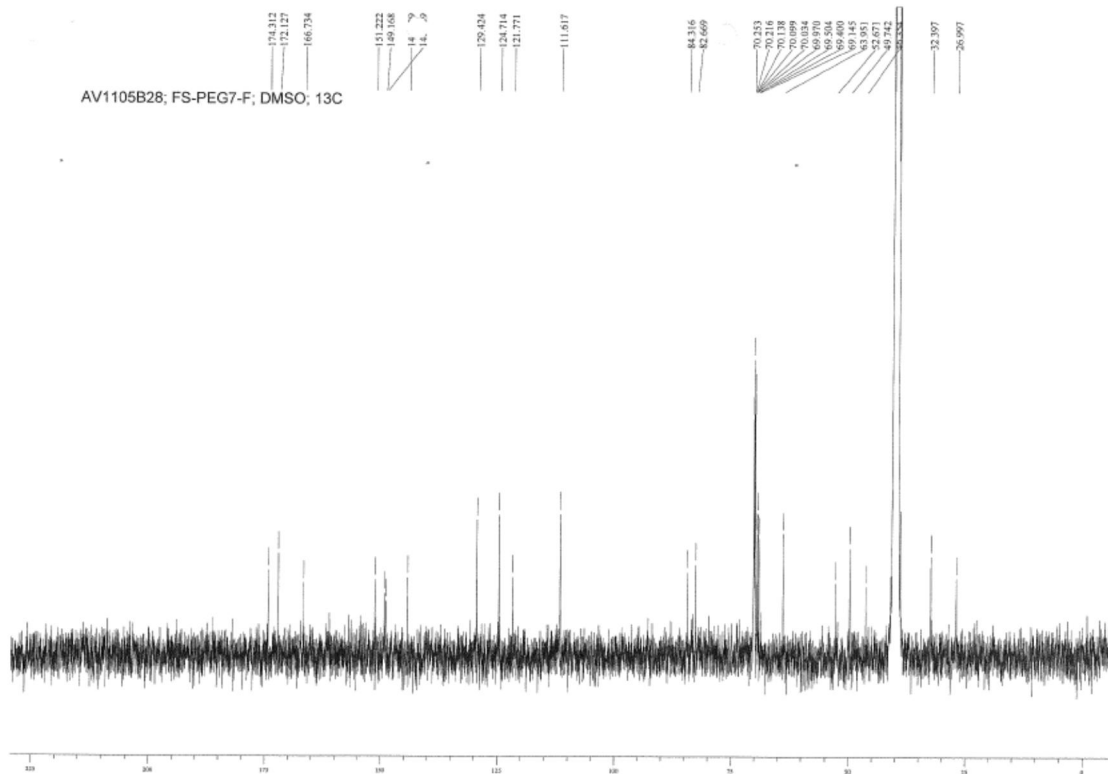

Figure 17  $^{13}\text{C}$  NMR; 400MHz, DMSO- $d_6$

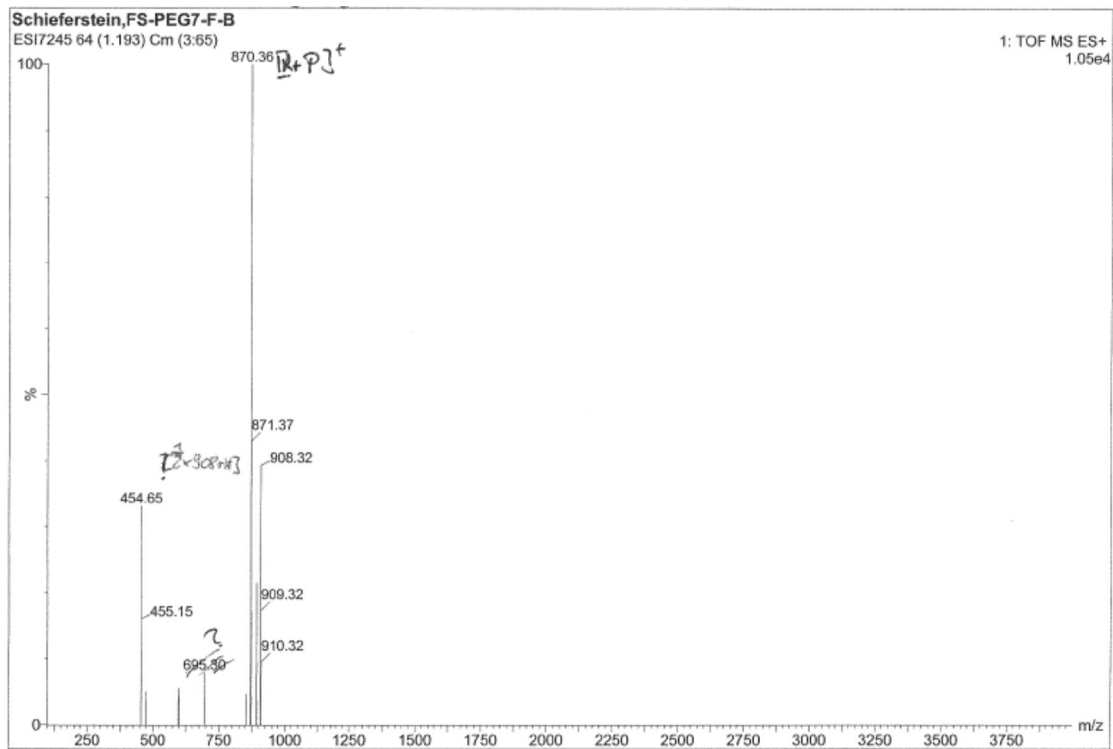

Figure 18. ESI-MS $^+$ ; Na/K-phosphate-buffer (0.05 M)

## Radiochemistry

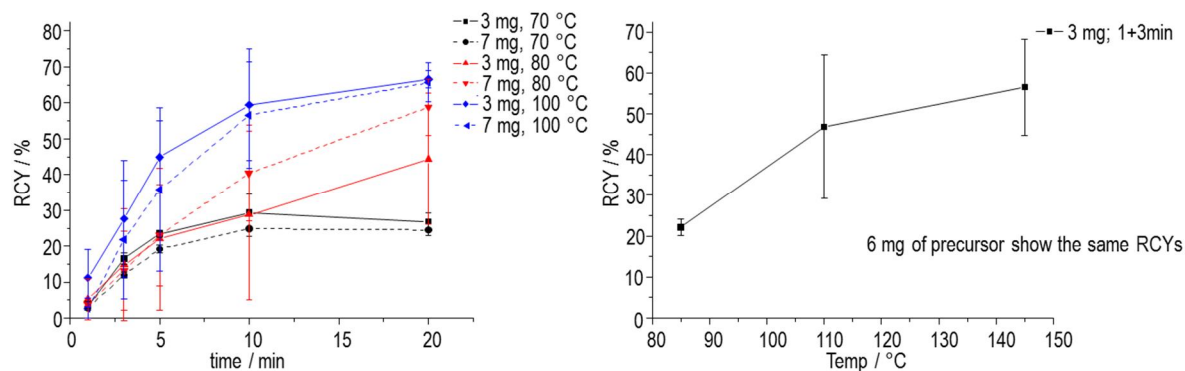

Figure 19. Optimization of the radiolabeling of the prosthetic group. Reaction was performed using acetonitrile and TBA-OH as bas. Conventional heating on the left side and the  $\mu$ wave supported synthesis on the right side.

## Prosthetic group synthesis

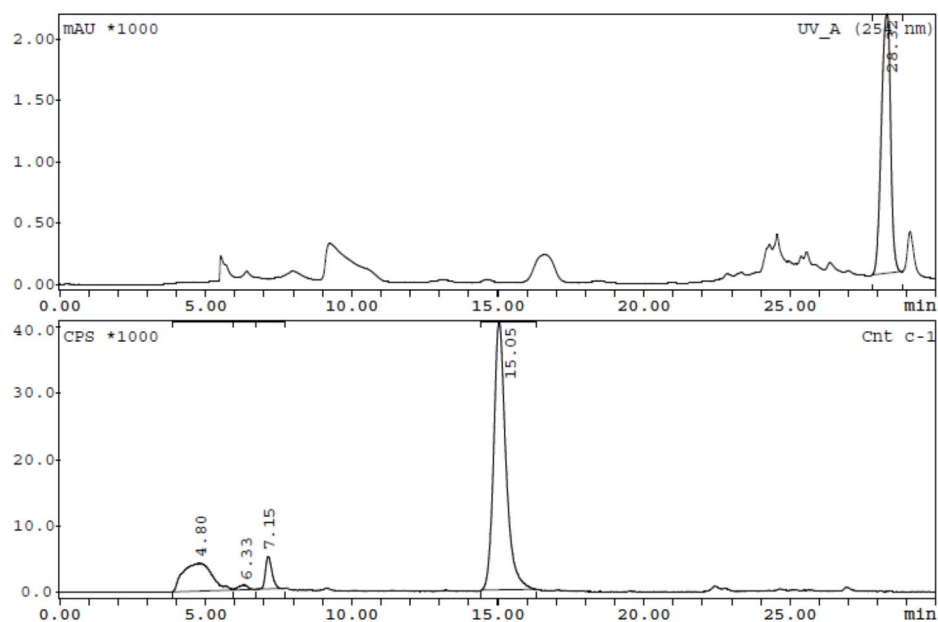

Integration Cnt c-1

| Substance  | R/T min | Type | Area Counts | %Area % |
|------------|---------|------|-------------|---------|
| Reg #1     | 4.80    | BD   | 287528      | 18.61   |
| Reg #2     | 6.33    | DD   | 15000       | 0.97    |
| Reg #3     | 7.15    | DB   | 74406       | 4.82    |
| Reg #4     | 15.05   | BB   | 1167944     | 75.60   |
| Sum in ROI |         |      | 1544877     |         |
| Area       |         |      | 1931345     |         |
| Ext. BKG   |         |      | 0.00 CPS    |         |

Integration UV\_A (254 nm)

| Substance  | R/T min | Type | Area mAU*min | %Area % |
|------------|---------|------|--------------|---------|
| Reg #1     | 28.32   | BB   | 46365.18     | 100.00  |
| Sum in ROI |         |      | 46365.18     |         |

# [<sup>18</sup>F]OEG-folate synthesis

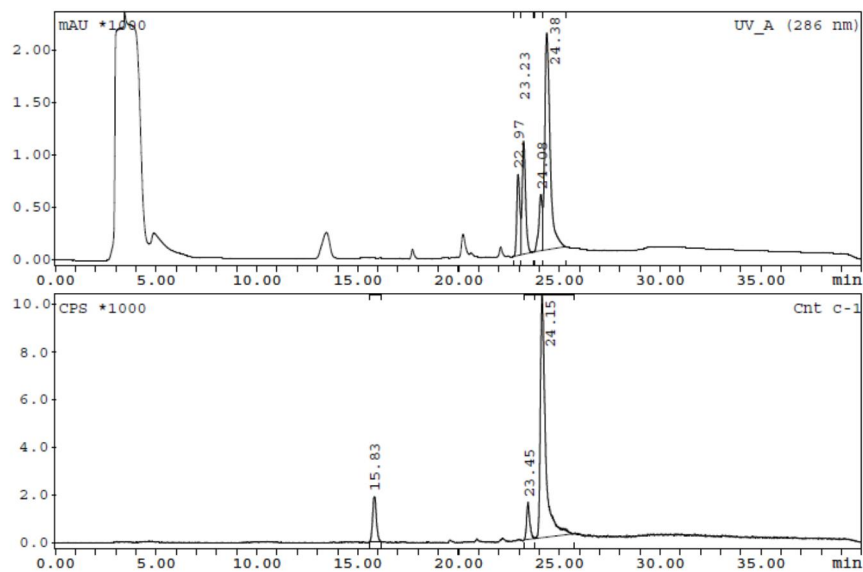

Integration Cnt c-1

| Substance  | R/T min | Type | Area Counts | %Area % |
|------------|---------|------|-------------|---------|
| Reg #1     | 15.83   | BB   | 24249.9     | 10.82   |
| Reg #2     | 23.45   | BD   | 16478.8     | 7.35    |
| Reg #3     | 24.15   | DB   | 183438.2    | 81.83   |
| Sum in ROI |         |      | 224166.9    |         |
| Area       |         |      | 530601.0    |         |
| Ext. BKG   |         |      | 0.00 CPS    |         |

Integration UV\_A (286 nm)

| Substance | R/T min | Type | Area mAU*min | %Area % |
|-----------|---------|------|--------------|---------|
| Reg #1    | 22.97   | BD   | 8101.82      | 12.30   |
| Reg #2    | 23.23   | DB   | 12854.45     | 19.51   |
| Reg #3    | 24.08   | BD   | 6307.47      | 9.57    |

## Quality Control

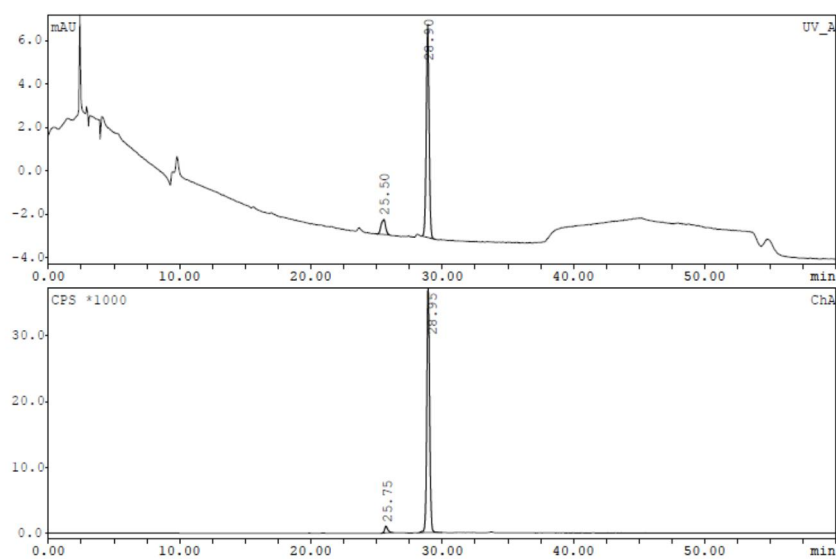

Integration ChA

| Substance  | R/T min | Type | Area Counts | %Area % |
|------------|---------|------|-------------|---------|
| Reg #1     | 25.75   | BB(  | 16888.9     | 2.95    |
| Reg #2     | 28.95   | BB(  | 555790.3    | 97.05   |
| Sum in ROI |         |      | 572679.1    |         |
| Area       |         |      | 692413.2    |         |
| Ext. BKG   |         |      | 0.00 CPS    |         |

Integration UV\_A

| Substance  | R/T min | Type | Area mAU*min | %Area % |
|------------|---------|------|--------------|---------|
| Reg #1     | 25.50   | BB(  | 16.4580      | 9.97    |
| Reg #2     | 28.90   | BB(  | 148.5847     | 90.03   |
| Sum in ROI |         |      | 165.0427     |         |

## Coinjection

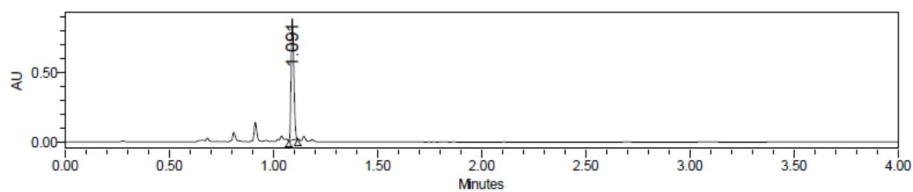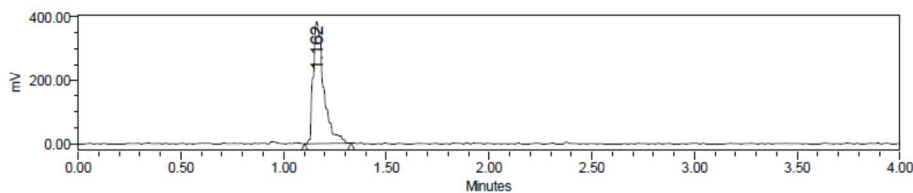

Channel Description: Channel 1, PDA Ch1  
254nm@1.2nm

|   | RT    | Area   | % Area | Height |
|---|-------|--------|--------|--------|
| 1 | 1.091 | 784850 | 100.00 | 874810 |

Channel Description: Channel 1

|   | RT    | Area    | % Area | Height |
|---|-------|---------|--------|--------|
| 1 | 1.162 | 1376165 | 100.00 | 384444 |

## Biology

### Plasmastability: FCS, 37 °C, n= 3

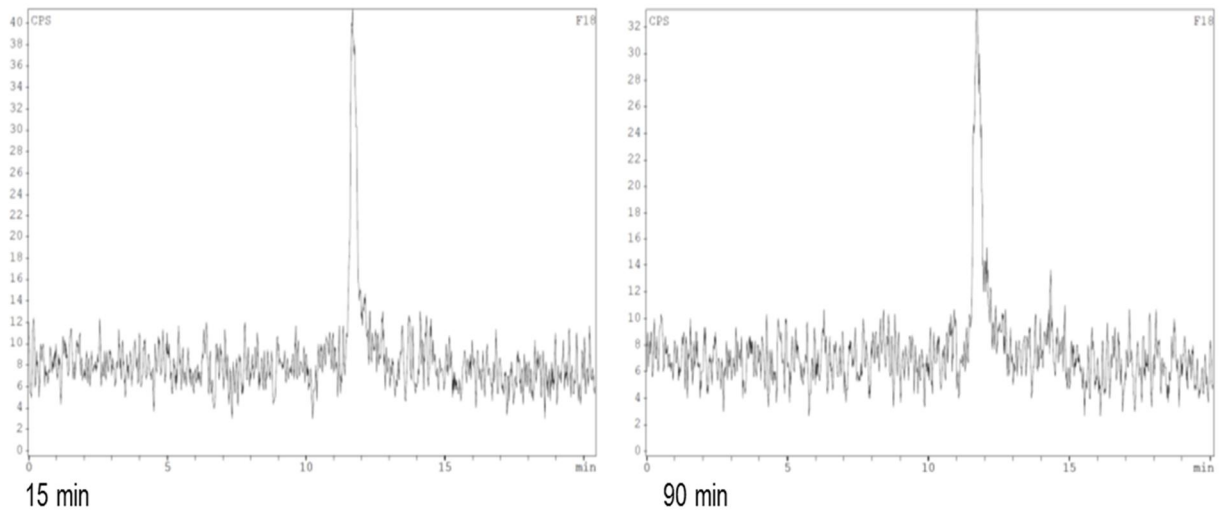

Figure 20. Plasmastability tests using fetal calve serum. Tracer was incubated over 90 min at 37 °C. Aliquots were taken after various time points and injected into an analytical HPLC-system after plasmaproteins have been precipitated.

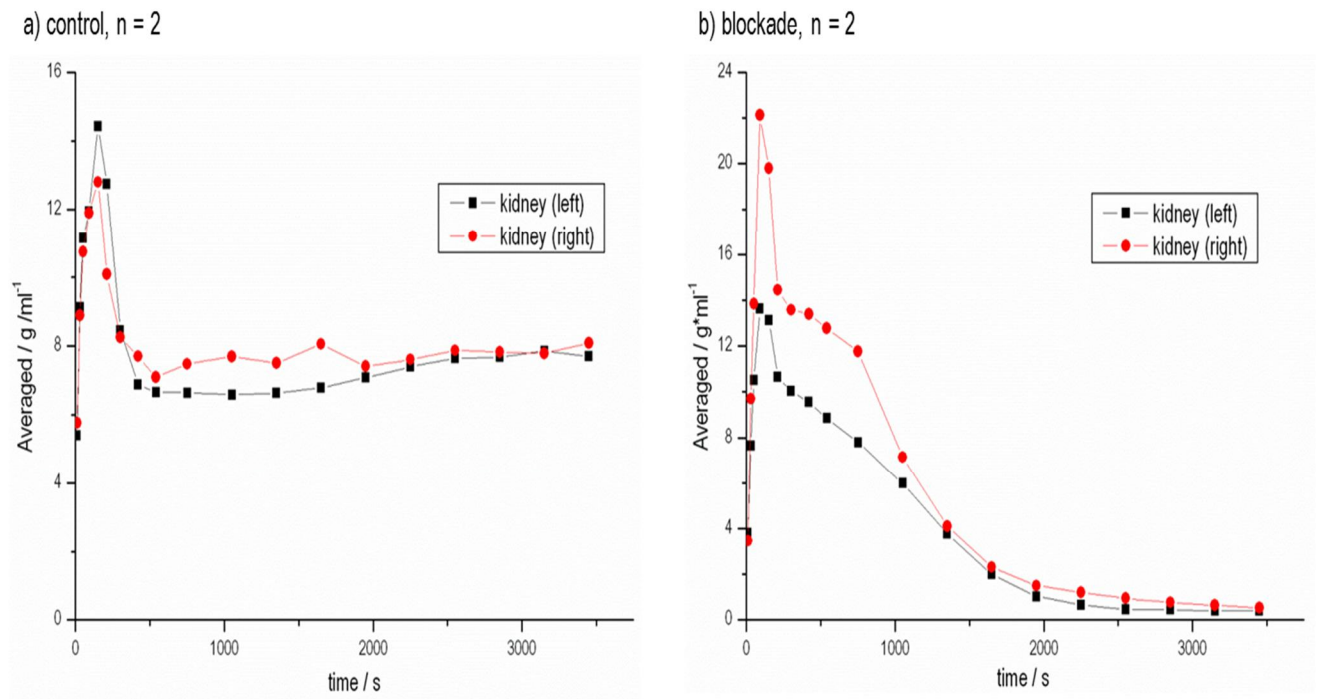

Figure 21. Preliminary  $\mu$ PET studies. left) male healthy CD rats (230 – 310 g), ID 20 – 30 MBq, scanning 60 min dynamic; right) blockade 4 mg/kg 10 min before tracer administration.
